# Supplementary material for: The influence of childhood adversities on mid to late cognitive function: From the perspective of life course
Source: PubMed Central journal article supplement (PMC8366991; doi:10.1371/journal.pone.0256297), 2021-08-16
Supplement: pone.0256297.s001.pdf [file pone.0256297.s001.pdf]

**S1 Table. Assignment of latent variables and observed variables.**

| Latent variables                          | Observed variables                                    | Assignment                                                                                                                                                                            |
|-------------------------------------------|-------------------------------------------------------|---------------------------------------------------------------------------------------------------------------------------------------------------------------------------------------|
|                                           | Gender                                                | 1=Male, 0=Female                                                                                                                                                                      |
|                                           | Age                                                   | 4=Above 90 years old, 3=75~90 years old, 2=60~75 years old, 1=45~60 years old                                                                                                         |
| Low childhood socioeconomic status        | Mother's education                                    | 5= Bachelor degree or above, 4= Some college, 3= High school (secondary specialized school), 2= Junior high school, 1= Primary school, 0= Illiterate                                  |
|                                           | Father's education                                    | 5= Bachelor degree or above, 4= Some college, 3= High school (secondary specialized school), 2= Junior high school, 1= Primary school, 0= Illiterate                                  |
|                                           | Father's occupation                                   | 2= Non-farming, 1= Farming, 0= Unemployment                                                                                                                                           |
|                                           | Self-assessed household economic status               | 5=Very good, 4=Good, 3=Fair, 2=Poor, 1=Very poor                                                                                                                                      |
| Lack of friends                           | The frequency of discomfort                           | 4= Often, 3= Sometimes, 2= Not very often, 1= Never                                                                                                                                   |
|                                           | Existence of good friendship                          | 2=No, 1=Yes                                                                                                                                                                           |
|                                           | The frequency of unhappiness                          | 4= Often, 3= Sometimes, 2= Not very often, 1= Never                                                                                                                                   |
| Childhood parental mental health problems | The frequency of nervousness and anxiety for mother   | 4= A little of the time,3=Some of the time, 2=Good part of the time, 1=Most of the time                                                                                               |
|                                           | The frequency of sadness and panic for mother         | 4= A little of the time,3=Some of the time, 2=Good part of the time, 1=Most of the time                                                                                               |
|                                           | The frequency of nervousness and anxiety for father   | 4= A little of the time,3=Some of the time, 2=Good part of the time, 1=Most of the time                                                                                               |
|                                           | The frequency of sadness and panic for father         | 4= A little of the time,3=Some of the time, 2=Good part of the time, 1=Most of the time                                                                                               |
| Poor parent-child relationships           | Self-assessed relationship with mother                | 5=Excellent, 4=Very good, 3= Good, 2=Fair, 1=Poor                                                                                                                                     |
|                                           | Self-assessed relationship with father                | 5=Excellent, 4=Very good, 3= Good, 2=Fair, 1=Poor                                                                                                                                     |
|                                           | The relationship between parents                      | 5=Excellent, 4=Very good, 3= Good, 2=Fair, 1=Poor                                                                                                                                     |
| Poor health status in mid to late life    | The presence of hypertension                          | 1=Yes, 0=No                                                                                                                                                                           |
|                                           | The presence of diabetes                              | 1=Yes, 0=No                                                                                                                                                                           |
|                                           | The presence of cardiovascular disease                | 1=Yes, 0=No                                                                                                                                                                           |
|                                           | Self-rated health status                              | 5=Very poor, 4=Poor, 3=Fair, 2=Good, 1=Very Good                                                                                                                                      |
| Depression                                | I was bothered by things that don't usually bother me | 3= Most or all of the time (5- 7 days), 2=Occasionally or a moderate amount of the time (3- 4 days), 1=Some or a little of the time(1- 2 days), 0=Rarely or none of the time(< 1 day) |
|                                           | I had trouble keeping my mind on what I was doing     | 3= Most or all of the time (5- 7 days), 2=Occasionally or a moderate amount of the time (3- 4 days), 1=Some or a little of the time(1- 2 days), 0=Rarely or none of the time(< 1 day) |

|                                              |                                       |                                                                                                                                                                                        |
|----------------------------------------------|---------------------------------------|----------------------------------------------------------------------------------------------------------------------------------------------------------------------------------------|
|                                              | I felt depressed                      | 3= Most or all of the time (5- 7 days), 2=Occasionally or a moderate amount of the time (3- 4 days), 1=Some or a little of the time(1- 2 days), 0=Rarely or none of the time( < 1 day) |
|                                              | I felt everything I did was an effort | 3= Most or all of the time (5- 7 days), 2=Occasionally or a moderate amount of the time (3- 4 days), 1=Some or a little of the time(1- 2 days), 0=Rarely or none of the time( < 1 day) |
|                                              | I felt hopeful about the future       | 3=Rarely or none of the time( < 1 day) , 2=Some or a little of the time(1- 2 days), 1=Occasionally or a moderate amount of the time (3- 4 days),0= Most or all of the time (5- 7 days) |
|                                              | I felt fearful                        | 3= Most or all of the time (5- 7 days), 2=Occasionally or a moderate amount of the time (3- 4 days), 1=Some or a little of the time(1- 2 days), 0=Rarely or none of the time( < 1 day) |
|                                              | My sleep was restless                 | 3= Most or all of the time (5- 7 days), 2=Occasionally or a moderate amount of the time (3- 4 days), 1=Some or a little of the time(1- 2 days), 0=Rarely or none of the time( < 1 day) |
|                                              | I was happy                           | 3=Rarely or none of the time( < 1 day) , 2=Some or a little of the time(1- 2 days), 1=Occasionally or a moderate amount of the time (3- 4 days),0= Most or all of the time (5- 7 days) |
|                                              | I felt lonely                         | 3= Most or all of the time (5- 7 days), 2=Occasionally or a moderate amount of the time (3- 4 days), 1=Some or a little of the time(1- 2 days), 0=Rarely or none of the time( < 1 day) |
|                                              | I could not get "going"               | 3= Most or all of the time (5- 7 days), 2=Occasionally or a moderate amount of the time (3- 4 days), 1=Some or a little of the time(1- 2 days), 0=Rarely or none of the time( < 1 day) |
| Low socioeconomic status in mid to late life | Residency                             | 2= Urban, 1= Rural                                                                                                                                                                     |
|                                              | Educational attainment                | 5= Bachelor degree or above, 4= Some college, 3= High school (secondary specialized school), 2= Junior high school, 1= Primary school, 0= Illiterate                                   |
|                                              | Household economic status             | 5=Very good, 4=Good, 3=Fair, 2=Poor , 1=Very poor                                                                                                                                      |
| Cognitive function                           | Orientation and calculation           | Continuous variable                                                                                                                                                                    |
|                                              | Immediate memory                      | Continuous variable                                                                                                                                                                    |
|                                              | Delayed memory                        | Continuous variable                                                                                                                                                                    |
