# Supplementary material for: The influence of childhood adversities on mid to late cognitive function: From the perspective of life course
Source: PubMed Central journal article supplement (PMC8366991; doi:10.1371/journal.pone.0256297), 2021-08-16
Supplement: pone.0256297.s002.pdf [file pone.0256297.s002.pdf]

**S2 Table. Description of childhood adversities (N=9,942).**

| Variable                                       | n    | %    |
|------------------------------------------------|------|------|
| <b>LOW childhood socioeconomic status</b>      |      |      |
| <b>Mother's education</b>                      |      |      |
| Illiterate                                     | 8807 | 88.6 |
| Primary school                                 | 959  | 9.6  |
| Junior high school                             | 114  | 1.1  |
| High school (secondary Specialized school)     | 49   | 0.5  |
| Some college                                   | 4    | 0    |
| Bachelor degree or above                       | 9    | 0.1  |
| <b>Father's education</b>                      |      |      |
| Illiterate                                     | 5914 | 59.5 |
| Primary school                                 | 3283 | 33   |
| Junior high school                             | 442  | 4.4  |
| High school (secondary Specialized school)     | 220  | 2.2  |
| Some college                                   | 23   | 0.2  |
| Bachelor degree or above                       | 60   | 0.6  |
| <b>Father's occupation</b>                     |      |      |
| Non-farming                                    | 1783 | 17.9 |
| Farming                                        | 8015 | 80.6 |
| Not working                                    | 144  | 1.4  |
| <b>Self-assessed household economic status</b> |      |      |
| Very poor                                      | 104  | 1    |
| Poor                                           | 800  | 8    |
| Fair                                           | 5252 | 52.8 |
| Good                                           | 1584 | 15.9 |
| Very good                                      | 2202 | 22.1 |
| <b>Lack of friends</b>                         |      |      |
| <b>The frequency of discomfort</b>             |      |      |
| Never                                          | 1377 | 13.9 |
| Not very often                                 | 880  | 8.9  |
| Sometimes                                      | 1316 | 13.2 |
| Often                                          | 6369 | 64.1 |

|                                                            |      |      |
|------------------------------------------------------------|------|------|
| <b>Existence of good friendship</b>                        |      |      |
| No                                                         | 4855 | 48.8 |
| Yes                                                        | 5087 | 51.2 |
| <b>The frequency of unhappiness</b>                        |      |      |
| Never                                                      | 1041 | 10.5 |
| Not very often                                             | 738  | 7.4  |
| Sometimes                                                  | 2266 | 22.8 |
| Often                                                      | 5897 | 59.3 |
| <b><i>Childhood parental mental health problems</i></b>    |      |      |
| <b>The frequency of nervousness and anxiety for mother</b> |      |      |
| Most of the time                                           | 733  | 7.4  |
| Good part of the time                                      | 914  | 9.2  |
| Some of the time                                           | 1608 | 16.2 |
| A little of the time                                       | 6687 | 67.3 |
| <b>The frequency of sadness and panic for mother</b>       |      |      |
| Most of the time                                           | 544  | 5.5  |
| Good part of the time                                      | 802  | 8.1  |
| Some of the time                                           | 1488 | 15   |
| A little of the time                                       | 7108 | 71.5 |
| <b>The frequency of nervousness and anxiety for father</b> |      |      |
| Most of the time                                           | 586  | 5.9  |
| Good part of the time                                      | 827  | 8.3  |
| Some of the time                                           | 1404 | 14.1 |
| A little of the time                                       | 7125 | 71.7 |
| <b>The frequency of sadness and panic for father</b>       |      |      |
| Most of the time                                           | 418  | 4.2  |
| Good part of the time                                      | 612  | 6.2  |
| Some of the time                                           | 1254 | 12.6 |
| A little of the time                                       | 7658 | 77   |
| <b><i>Poor parent-child relationships</i></b>              |      |      |
| <b>Self-assessed relationship with mother</b>              |      |      |
| Poor                                                       | 86   | 0.9  |

|                                               |      |      |
|-----------------------------------------------|------|------|
| Fair                                          | 1674 | 16.8 |
| Good                                          | 1746 | 17.6 |
| Very good                                     | 3098 | 31.2 |
| Excellent                                     | 3338 | 33.6 |
| <b>Self-assessed relationship with father</b> |      |      |
| Poor                                          | 115  | 1.2  |
| Fair                                          | 1870 | 18.8 |
| Good                                          | 1843 | 18.5 |
| Very good                                     | 3156 | 31.7 |
| Excellent                                     | 2958 | 29.8 |
| <b>The relationship between parents</b>       |      |      |
| Poor                                          | 192  | 1.9  |
| Fair                                          | 2377 | 23.9 |
| Good                                          | 1822 | 18.3 |
| Very good                                     | 3209 | 32.3 |
| Excellent                                     | 2342 | 23.6 |
